# Supplementary material
Source: PubMed Central journal article supplement (PMC4014276)

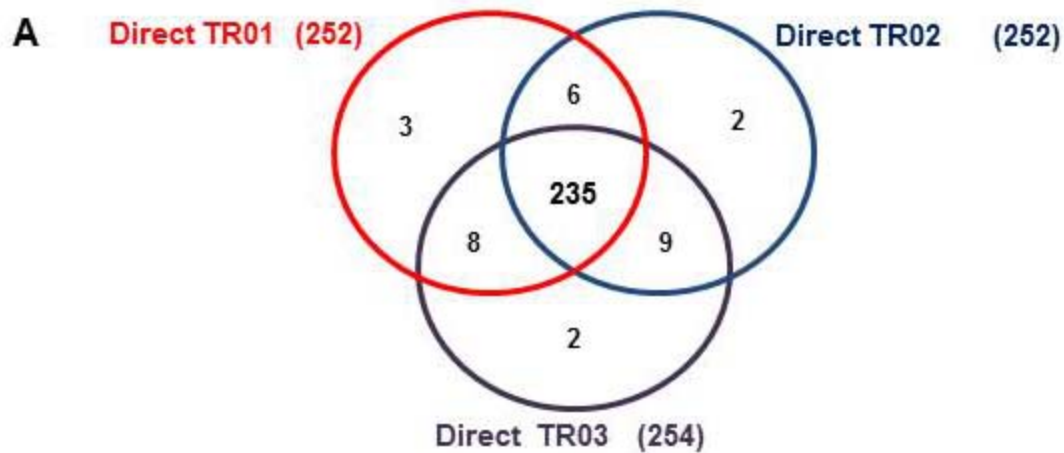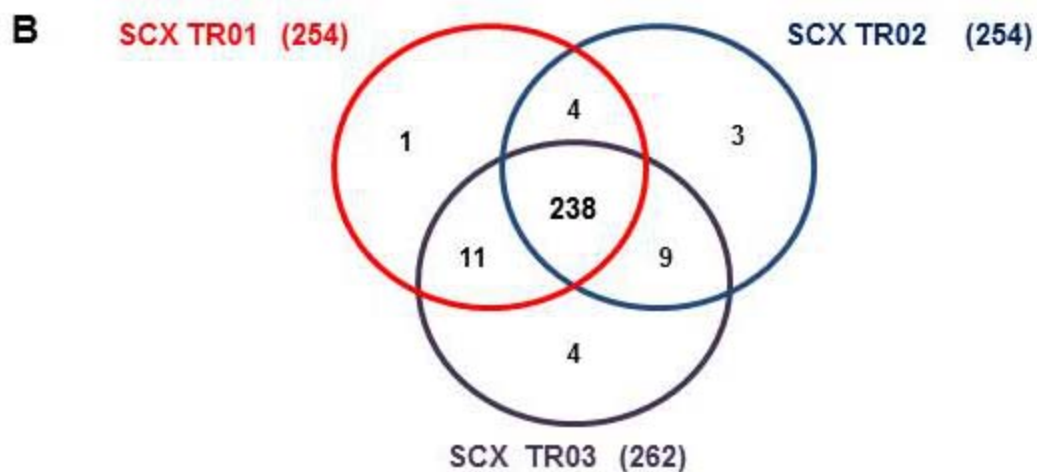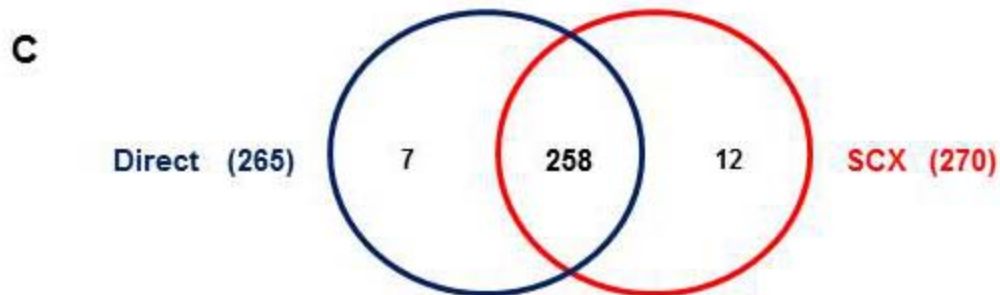

Supplement: supp_M113.035584_mcp.M113.035584-1.pdf [file supp_M113.035584_mcp.M113.035584-1.pdf]

A

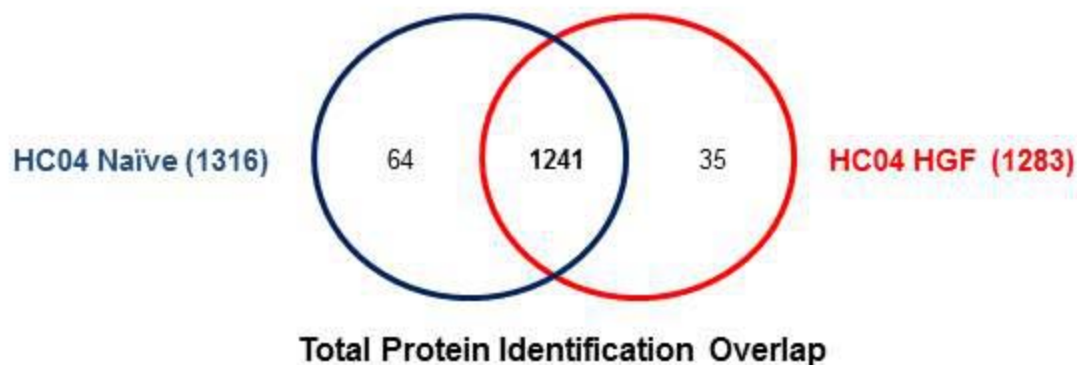

B

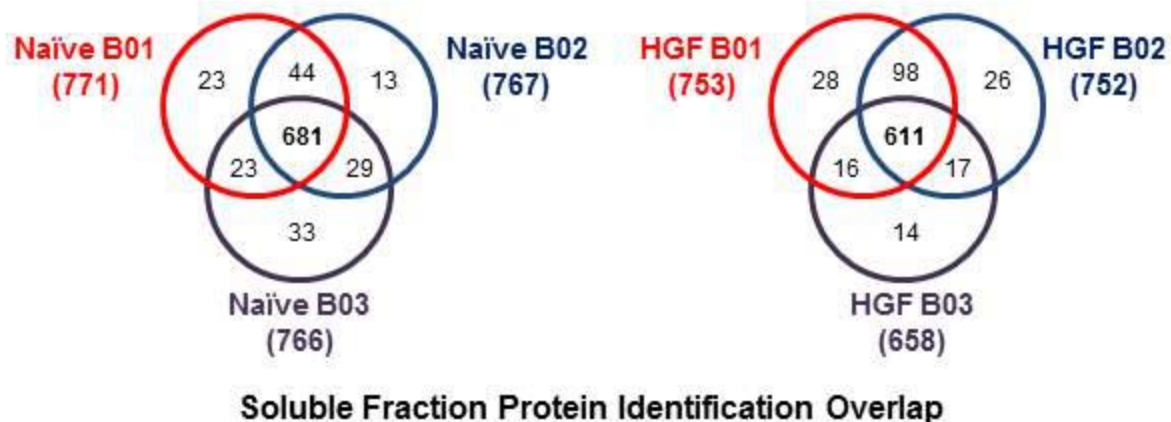

C

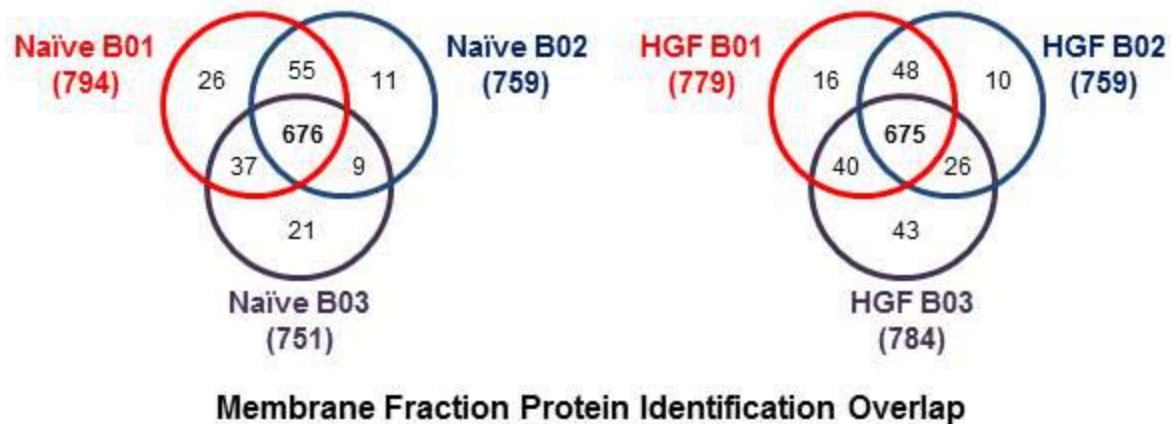

Supplement: supp_M113.035584_mcp.M113.035584-2.pdf [file supp_M113.035584_mcp.M113.035584-2.pdf]

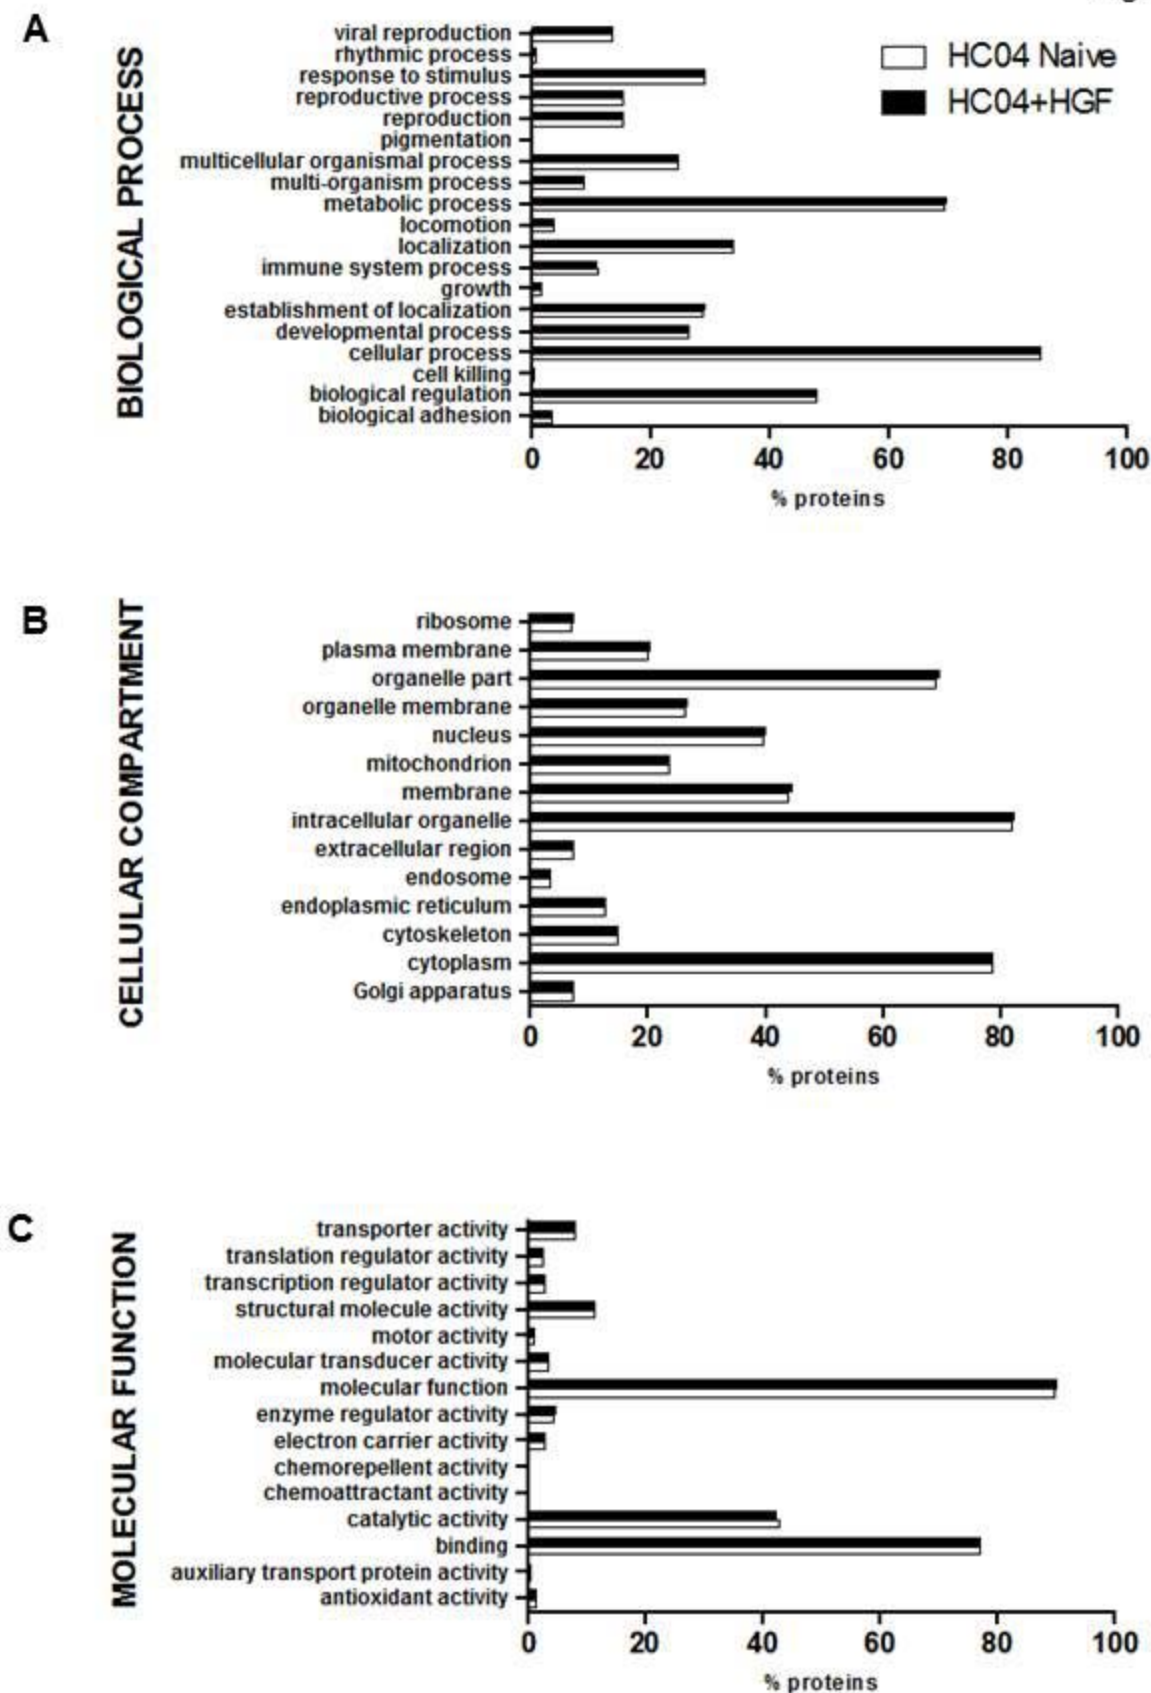

Supplement: supp_M113.035584_mcp.M113.035584-3.pdf [file supp_M113.035584_mcp.M113.035584-3.pdf]

Figure S4

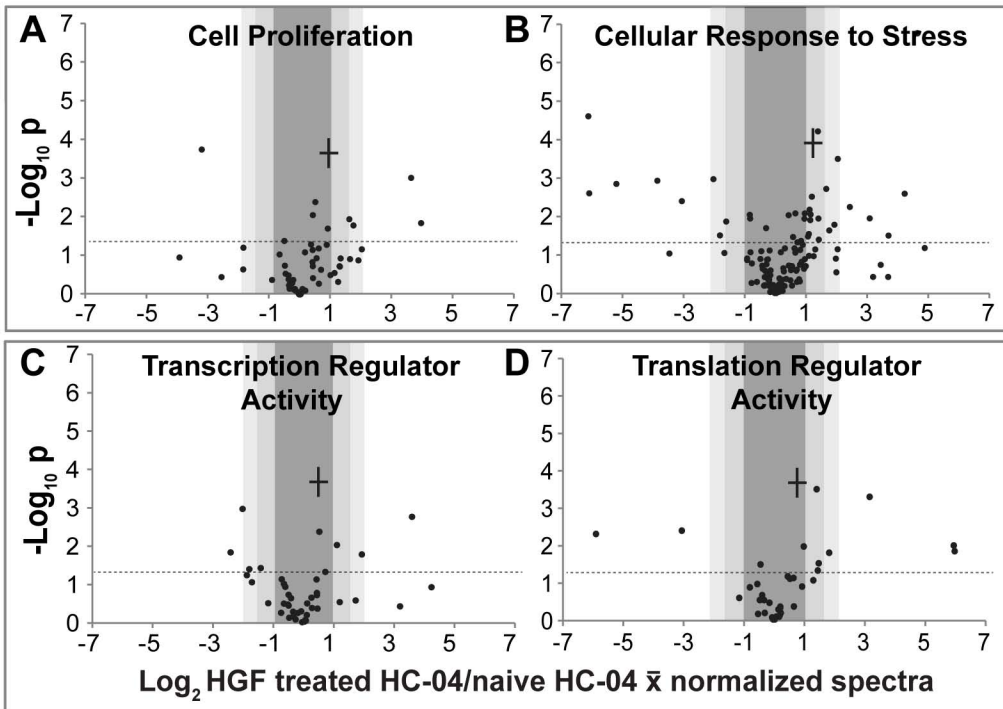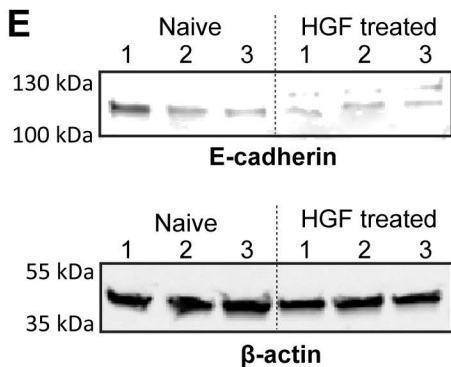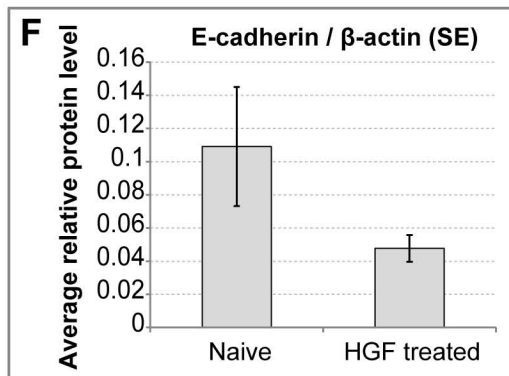

Supplement: supp_M113.035584_mcp.M113.035584-4.pdf [file supp_M113.035584_mcp.M113.035584-4.pdf]
